# Supplementary material
Source: Springer Nature journal article supplement (https://www.springermedizin.de/resource/supplementary/13054_2010_8346_MOESM1_ESM.pdf/9731760)

**Outcome****Diff. in Means  
(95% CI)****P-Value for  
Interaction****Delirium/Coma-Free Days**

3.2 (1.1, 4.9)

0.09

**Delirium-Free Days**

1.5 (-0.1, 2.8)

0.39

**Coma-Free Days**

3.3 (1.3, 5.2)

0.01

**Ventilator-Free Days**

6.0 (0.3, 11.0)

0.02

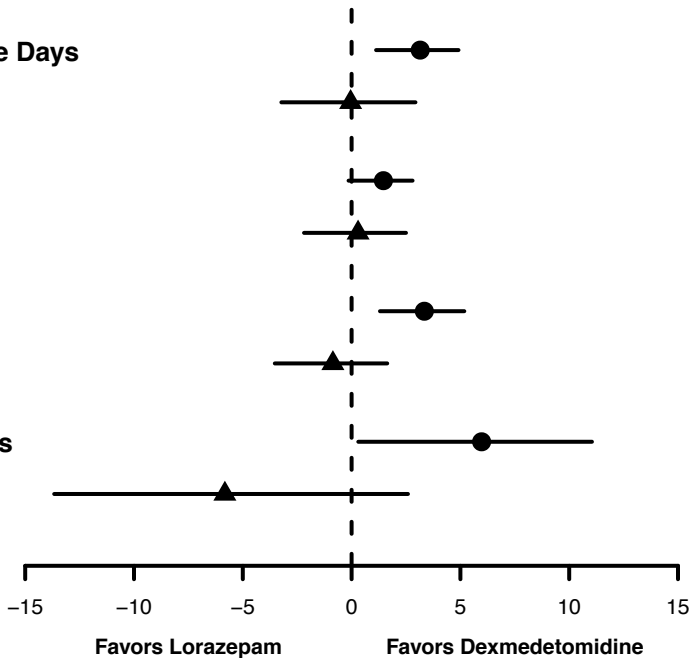

Supplement: MOESM1 [file 9731760]
